# Supplementary material for: Structural-morphological insights into optimization of hydrothermally synthesized MoSe2 nanoflowers for improving supercapacitor applications
Source: Royal Society of Chemistry journal article supplement (doi:10.1039/d4dt02993c), 2025-01-01
Supplement: d4dt02993c1.pdf [file d4dt02993c1.pdf]

ARTICLE

## Structural-Morphological Insights into Optimization of Hydrothermally Synthesized MoSe<sub>2</sub> Nanoflowers for Improving Supercapacitor Application

Received 00th January 20xx,  
 Accepted 00th January 20xx

Poonam Yadav,<sup>a</sup> Rohit Yadav,<sup>b</sup> Jitesh Pani,<sup>b</sup> Ram Meher Singh,<sup>\*a</sup> Davender Singh,<sup>c</sup> Kusum Kumari,<sup>b</sup> Hitesh Borkar<sup>b</sup> and Jitendra Gangwar<sup>\*\*c</sup>

DOI: 10.1039/x0xx00000x

The MoSe<sub>2</sub> nanoflowers (MNF) have temperature-independent optical properties with direct energy band gap ( $E_g$ ) of 1.76 eV.

### Experimental

#### Characterization

UV-visible absorption spectroscopy was conducted on a Double Beam UV-Vis Spectrophotometer (Motra's UVPlus) in diffuse-reflectance mode to evaluate the optical absorption and band-gap of MoSe<sub>2</sub> nanostructures.

### Results and discussion

#### Optical Properties

Fig. S1(a) elucidates the UV-Vis spectra of MoSe<sub>2</sub> nanoflowers obtained at three different synthesis temperatures via hydrothermal methodology. It is well accepted that an optical emission and/or absorption corresponds to the emission or absorption of photons by the defects. The three characteristic absorptions peaks of MoSe<sub>2</sub> are obtained for wavelength ranging 600-800 nm due to interband electronic excitation of the material indicating the formation of refined 2H phase MoSe<sub>2</sub>. The three excitons are obtained as; A (783 nm, 797 nm and 787 nm), B (687 nm, 699 nm and 697 nm), C (600 nm, 610 nm and 609 nm) for MNF\_200, MNF\_210 and MNF\_220, respectively. Intriguingly, a red-shift is observed in exciton peak positions as we increase the synthesis temperature whereas a blue-shift is identified with further enhancement in temperature.

The optical energy band-gap ( $E_g$ ) is evaluated from UV-Vis absorbance spectra using Tauc equation (1);

$$(\alpha h\nu)^n = A(h\nu - E_g) \quad \dots(1)$$

Where,  $\alpha$  is an absorption coefficient obtained using Beer-Lambert Law,  $\nu$  is the incident photon frequency,  $h$  is Planck's

constant,  $h\nu$  is the energy of incident photons,  $n = 2$  or  $\frac{1}{2}$  for direct or indirect band gap transitions and  $A$  is the characteristic of material with a constant value.

Fig. S1(b) displays the energy band-gap of MoSe<sub>2</sub> nanoflowers. The intercept on photon energy ( $h\nu$ ) of the plot  $(\alpha h\nu)^2$  versus  $h\nu$  illustrates the optical energy band-gap values about 1.76 eV for all MoSe<sub>2</sub> nanoflowers synthesized at different temperature. It is obvious that there is a very weak effect of process temperature on the optical properties of MoSe<sub>2</sub> nanoflowers.

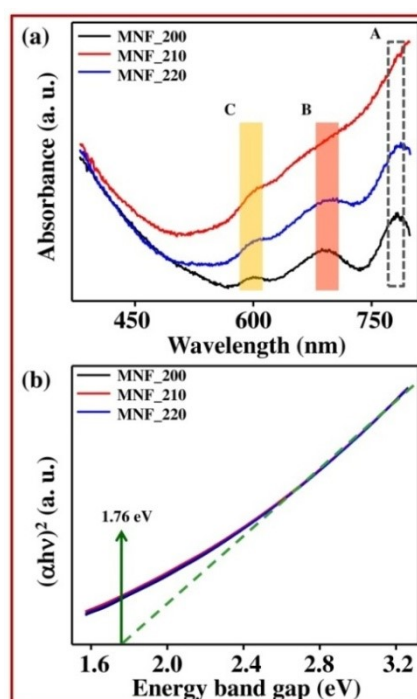

Fig. S1 (a) UV-Vis absorbance spectra; (b) Tauc plot depicting direct energy band gap of MNF\_200, MNF\_210, and MNF\_220.

<sup>a</sup> Department of Physics, Chaudhary Devi Lal University, Sirsa, Haryana 125055, India. E-mail: dixitrammehar@cdu.ac.in; Tel: +91-1666-239835

<sup>b</sup> Department of Physics, National Institute of Technology, Warangal, Telangana 506004, India.

<sup>c</sup> Department of Physics, RPS Degree College, Balana, Mahendargarh, Haryana 123029, India. E-mail: njitendrag127@gmail.com; Tel: +91-1285-241432
